1 **Arabidopsis PAD4 lipase-like domain is a minimal functional unit in resistance to**  
2 **green peach aphid**

3 Joram A. Dongus<sup>1</sup>, Deepak D. Bhandari<sup>1%</sup>, Monika Patel<sup>2</sup>, Lani Archer<sup>2</sup>, Lucas  
4 Dijkgraaf<sup>1,3</sup>, Laurent Deslandes<sup>4</sup>, Jyoti Shah<sup>2</sup> and Jane E. Parker<sup>1\*</sup>

5 <sup>1</sup> - Department of Plant-Microbe Interactions, Max Planck Institute for Plant Breeding  
6 Research, Carl-von-Linné-weg 10; 50829 Cologne, Germany.

7 <sup>2</sup> - Department of Biological Sciences, University of North Texas; 1511 West  
8 Sycamore, Denton, Texas 76201, U.S.A.

9 <sup>3</sup> - Plant-Microbe Interactions - Utrecht University, Padualaan 8; 3584 CH Utrecht,  
10 Netherlands.

11 <sup>4</sup> - LIPM, Université de Toulouse, INRA, CNRS, Castanet-Tolosan, France

12

13 % - present address: Plant Research Laboratory, Michigan State University, USA

14 \*Corresponding author: Jane E. Parker: [parker@mpipz.mpg.de](mailto:parker@mpipz.mpg.de)

15 Keywords: PAD4, EDS1, plant, basal immunity, ETI, aphid.

16 Funding: This work was supported by the Max Planck Society and Deutsche  
17 Forschungsgemeinschaft (DFG) Grants: DFG-ANR Trilateral 'RADAR' grant (JAD,  
18 LaD (ANR-15-CE20-0016-01), JEP), CRC670 (DDB, JEP), and MP was supported by  
19 a scholarship from the University of North Texas.

20

21 **Abstract**

22 Plants have evolved mechanisms to attract beneficial microbes and insects while  
23 protecting themselves against pathogenic microbes and pests. In Arabidopsis, the  
24 immune regulator PAD4 functions with its cognate partner EDS1 to limit pathogen  
25 growth. PAD4, independently of EDS1, reduces infestation by Green Peach Aphid  
26 (GPA). How PAD4 regulates these defense outputs is unclear. By expressing the N-  
27 terminal PAD4-lipase-like domain (LLD) without its C-terminal 'EDS1-PAD4' (EP)  
28 domain, we interrogated PAD4 functions in plant defense. Here we show that  
29 transgenic expression of PAD4<sup>LLD</sup> in Arabidopsis is sufficient for limiting GPA  
30 infestation, but not for conferring basal and effector-triggered pathogen immunity.  
31 This suggests that the C-terminal PAD4-EP domain is necessary for EDS1-  
32 dependent immune functions. Moreover, PAD4<sup>LLD</sup> is not sufficient to interact with  
33 EDS1, indicating the PAD4-EP domain is required for heterodimerisation. These data  
34 provide molecular evidence that PAD4 has domain specific functions.

35

36 **Keywords:** PAD4, EDS1, plant, basal immunity, ETI, aphid.

## 37 **Introduction**

38 To colonize plants, pathogenic microbes and pests (such as aphids or nematodes)  
39 deliver susceptibility factors, called effectors, to the host which target defenses and  
40 reprogram cells to promote infection or infestation. Many host-adapted biotrophic and  
41 hemi-biotrophic pathogens deploy effectors to disable PAMP/MAMP-triggered  
42 immunity (PTI) mediated by cell surface-resident receptors [Boutrot & Zipfel, 2017;  
43 Dangl & Jones, 2006; Dodds & Rathjen, 2010]. These microbes encounter two further  
44 important immunity barriers. One is conferred by intracellular nucleotide-binding  
45 leucine-rich repeat (NLR) receptors recognizing interference by specific effectors  
46 [Jones et al., 2016]. NLR activation leads to effector-triggered immunity (ETI) involving  
47 the rapid transcriptional mobilization of resistance pathways and, often, localized host  
48 cell death, which limit pathogen infection [Bhandari et al., 2019; Cui et al., 2015; Mine  
49 et al., 2017]. NLR-mediated immune responses are also effective against probing  
50 insects and nematodes [Milligan et al., 1998; Rossi et al., 1998; Villada et al., 2009;  
51 Wroblewski et al., 2007]. A second barrier, called basal immunity, slows virulent  
52 pathogen growth and disease progression by eliciting a weak immune response [Cui  
53 et al., 2015; Cui et al., 2017; Dangl & Jones, 2006]. Although the precise activation  
54 mechanism for post-infection basal immunity is not known, in Arabidopsis it requires  
55 several ETI signaling components [Century et al., 1995; Feys et al., 2001; Glazebrook  
56 et al., 1997; Parker et al., 1996], and is proposed to be the culmination of weak NLR-  
57 triggered ETI combined with residual PTI [Cui et al., 2017; Gantner et al., 2019].

58 In Arabidopsis, the nucleocytoplasmic immune regulator PAD4 (PHYTOALEXIN  
59 DEFICIENT4) signals in both ETI and basal immunity by stimulating production of the  
60 defense hormone salicylic acid (SA) and anti-microbial molecules, which limit pathogen  
61 growth [Glazebrook et al., 1997; Jirage et al., 1999; Wiermer et al., 2005; Zhou et al.,  
62 1998]. PAD4 is a member of a small family (the EDS1 family) of sequence-related

63 immunity regulators, comprising also EDS1 (ENHANCED DISEASE  
64 SUSCEPTIBILITY1) and SAG101 (SENESCENCE ASSOCIATED GENE101) [Feys et  
65 al., 2005; Lapin et al., 2019]. Arabidopsis EDS1 and PAD4 function together in  
66 conferring ETI governed by a sub-class of NLRs with N-terminal Toll-interleukin1  
67 Receptor domains (known as TIR-NLRs or TNLs) [Feys et al., 2005; Jones et al., 2016;  
68 Wagner et al., 2013]. Genetic and molecular studies in Arabidopsis revealed that  
69 activated TNL receptors stimulate EDS1-PAD4 basal immunity activity to  
70 transcriptionally boost SA signaling and other defense responses, and repress  
71 antagonistic jasmonic acid (JA) hormone pathways [Cui et al., 2017; Cui et al., 2018].  
72 In Arabidopsis, the EDS1-PAD4 transcriptional reprogramming function in pathogen  
73 immunity requires a nuclear EDS1 pool [Bartsch et al., 2006; Cui et al., 2017; Garcia  
74 et al., 2009; Stuttmann et al., 2016].

75 EDS1, PAD4 and SAG101 each possess an N-terminal lipase-like domain (LLD) with  
76 an  $\alpha/\beta$  hydrolase topology resembling eukaryotic class-3 lipase enzymes [Rauwerdink  
77 & Kazlauskas, 2015; Wagner et al., 2013; Wang et al., 2018], and a structurally unique  
78 C-terminal EP (EDS1-PAD4) domain consisting of  $\alpha$ -helical bundles [PFAM database:  
79 PF18117; Wagner et al., 2013]. The EDS1 and PAD4, but not SAG101, LLDs have a  
80 canonical Ser-Asp-His (S-D-H) catalytic triad that is characteristic for  $\alpha/\beta$  hydrolases  
81 [Wagner et al., 2013]. The serine is part of a characteristic lipase GX SXG motif which  
82 is conserved in EDS1 and PAD4 proteins across seed plant (angiosperm and  
83 gymnosperm) species [Wagner et al., 2013; Lapin et al., 2019]. Strikingly, the S-D-H  
84 residues were found to be dispensable for EDS1 and PAD4 signaling in Arabidopsis  
85 TNL-mediated ETI and basal immunity, indicative of a non-catalytic mechanism in  
86 pathogen resistance [Louis et al., 2012; Wagner et al., 2013].

87 EDS1 forms stable and mutually exclusive heterodimers with PAD4 or SAG101,  
88 consistent with distinct roles of these two EDS1 complexes in immunity [Lapin et al.,  
89 2019; Rietz et al., 2011; Wagner et al., 2013]. Based on a structural model of the EDS1-  
90 PAD4 heterodimer generated from the *A*EDS1-*A*SAG101 crystal structure, analysis  
91 showed that the juxtaposed LLDs are major drivers of heterodimerisation, likely  
92 promoting association of the aligned EP domains to form a cavity [Wagner et al., 2013].  
93 The *A*EDS1<sup>LLD</sup> alone, although stable, did not confer pathogen resistance, indicating  
94 that its EP domain is crucial for immune signaling activity [Wagner et al., 2013]. Further  
95 structure-based analysis identified an *A*EDS1 EP-domain surface lining the EDS1-  
96 PAD4 heterodimer cavity which is essential for the rapid transcriptional reprogramming  
97 of host cells in Arabidopsis TNL ETI [Bhandari et al., 2019; Lapin et al., 2019].

98 In Arabidopsis, *PAD4* mediates resistance to green peach aphid (GPA, *Myzus persicae*  
99 Sülzer) independently of *EDS1* and *SAG101* [Pegadaraju et al., 2005 & 2007]. GPA  
100 population growth was higher on Arabidopsis *pad4* compared to wild-type (WT) and  
101 *eds1*, *sag101* or *eds1/sag101* mutant plants [Pegadaraju et al., 2007]. Notably, *PAD4*-  
102 mediated defenses against GPA were found to not involve SA or camalexin production  
103 [Pegadaraju et al., 2005]. Moreover, in contrast to basal immunity and ETI, resistance  
104 to GPA was dependent on the S-D-H predicted catalytic triad residues PAD4<sup>S118</sup> and  
105 PAD4<sup>D178</sup>, but not PAD4<sup>H229</sup> [Louis et al., 2012; Wagner et al., 2013]. These different  
106 requirements suggest that *PAD4* functions in immunity as a heterodimer with EDS1  
107 are distinct from its function in resistance to GPA.

108 To gain a deeper insight into the molecular function of *PAD4*, we investigate here the  
109 properties of the *PAD4*<sup>LLD</sup> in resistance to GPA and pathogen immunity. We show that  
110 the *PAD4*<sup>LLD</sup> alone is sufficient to control GPA infestation, independently of EDS1  
111 association. By contrast, we find that the Arabidopsis *PAD4*<sup>LLD</sup> is insufficient for EDS1-

112 dependent basal immunity and ETI, indicating that, like EDS1, the PAD4 EP domain is  
113 crucial for inducing immunity pathways. These results suggest that PAD4 can operate  
114 as a bipartite protein with the LLD and EP domains carrying out distinctive and  
115 separable roles in plant defense.

## 116 Results

### 117 The PAD4<sup>LLD</sup> protein accumulates *in planta*, but does not interact with EDS1

118 *AtEDS1-AtPAD4* heterodimer formation is driven chiefly by an N-terminal EDS1  
119 hydrophobic loop ( $\alpha$ -helix H; EDS1<sup>LLIF</sup>) and the juxtaposed PAD4<sup>MLF</sup> motif (Figure 1A-  
120 C) [Feys et al., 2001; Wagner et al., 2013]. To test PAD4<sup>LLD</sup> properties, we generated  
121 an *AtPAD4*<sup>LLD</sup> protein (residues 1-299; Figure 1A; blue). Transient overexpression of  
122 GFP-tagged PAD4<sup>LLD</sup> in *Nicotiana benthamiana* produced a stable protein that did not  
123 co-immunoprecipitate (co-IP) FLAG-tagged EDS1, whereas full-length GFP-PAD4 did  
124 (Figure 1D). Similarly, PAD4<sup>LLD</sup> failed to interact with EDS1 in an *N. benthamiana* split-  
125 luciferase assay (Figure S1). These data suggest that a stable interaction between  
126 PAD4 and EDS1 *in planta* requires part or all of the PAD4 EP domain in addition to the  
127 LLD interface.

128 To investigate PAD4<sup>LLD</sup> properties in Arabidopsis, we introduced WT PAD4  
129 (*pPAD4::streptII-YFP-cPAD4*<sup>WT</sup>) or PAD4<sup>LLD</sup> (*pPAD4::streptII-YFP-cPAD4*<sup>LLD</sup>)  
130 constructs into a *pad4-1/sag101-3* mutant (Col-0 accession). PAD4<sup>LLD</sup> in two  
131 independent stable transgenic lines showed a nucleocytoplasmic localization similar to  
132 PAD4<sup>WT</sup> at 24 h post infection (hpi) with *Pseudomonas syringae* pv. *tomato* strain  
133 DC3000 expressing the effector *avrRps4* (*Pst avrRps4*) (Figure S2). Delivery of  
134 *avrRps4* by *Pst* triggers ETI in Col-0 mediated by the receptor pair RRS1-S/RPS4  
135 (RESISTANCE TO RALSTONIA SOLANACEARUM1-S/RESISTANCE TO  
136 PSEUDOMONAS SYRINGAE4) [Birker et al., 2009; Heidrich et al., 2011; Narusaka et

137 al., 2009; Saucet et al., 2015]. The PAD4<sup>LLD</sup> distribution is in line with previously  
138 described nucleocytoplasmic localizations of EDS1<sup>LLD</sup> and PAD4<sup>LLD</sup>/SAG101<sup>EP</sup> domain  
139 chimeras *in planta* [Lapin et al., 2019; Wagner et al., 2013]. PAD4<sup>LLD</sup> protein was also  
140 immuno-detected from leaf samples treated with *Pst avrRps4*, although at much lower  
141 levels compared to PAD4<sup>WT</sup> lines (Figure 1E). This contrasts with similar PAD4<sup>LLD</sup> and  
142 PAD4<sup>WT</sup> accumulation in *N. benthamiana* transient assays (Figure 1D). Lower PAD4<sup>LLD</sup>  
143 protein accumulation than PAD4<sup>WT</sup> in mock- and *Pst avrRps4*-treated Arabidopsis  
144 leaves can be attributed in part to lower accumulation of *PAD4* transcripts in the  
145 PAD4<sup>LLD</sup> compared to PAD4<sup>WT</sup> transgenic lines (Figure 1F). Hence, the LLD domain of  
146 PAD4 is sufficient to maintain a WT-like nucleocytoplasmic localization, but loss of the  
147 EP domain substantially reduces PAD4-EDS1 interaction and PAD4 steady-state  
148 levels in Arabidopsis.

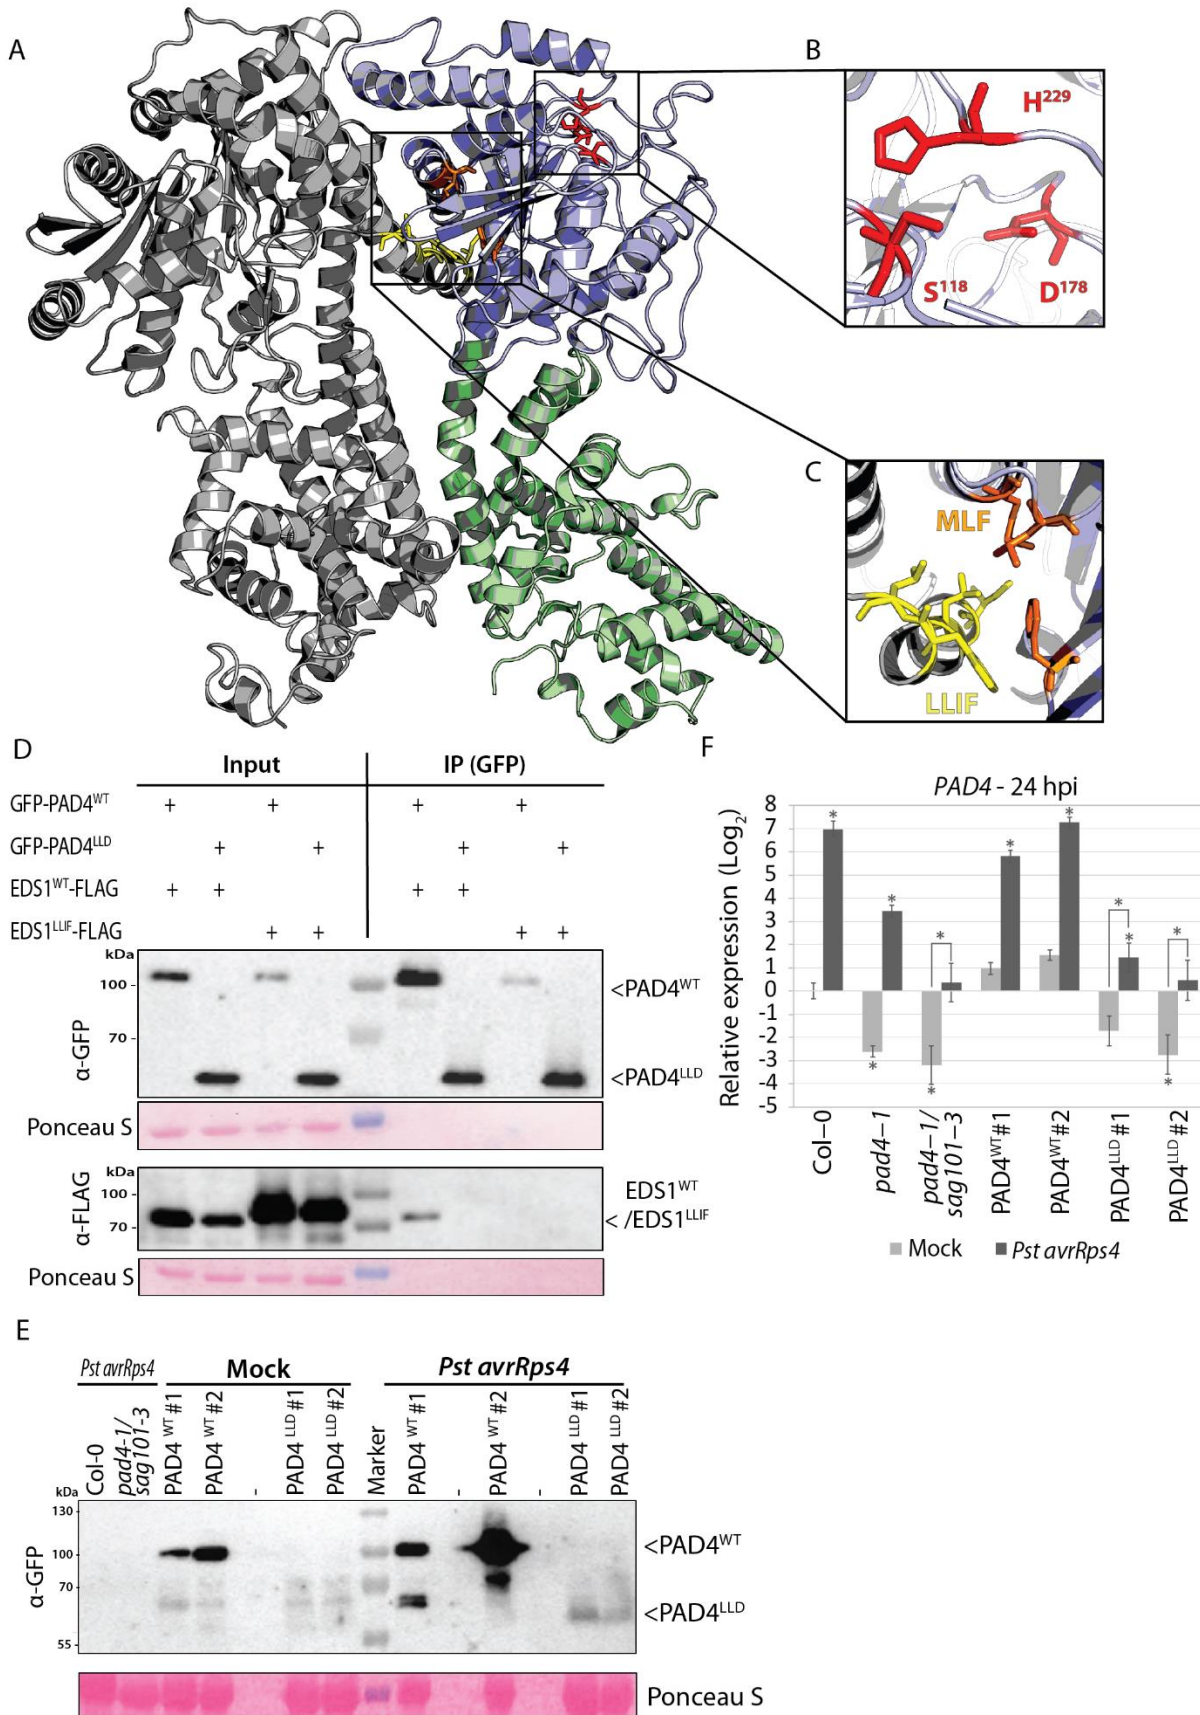



150 **Figure 1. PAD4<sup>LLD</sup> accumulates *in planta* but does not interact with EDS1**

151 **A.** EDS1-PAD4 heterodimer model, based on the AEDS1-A/SAG101 crystal structure  
152 [Wagner et al., 2013]. EDS1 (Grey), PAD4 (LLD) (blue) and PAD4 EP domain (green) are  
153 represented in cartoon format.

154 **B.** PAD4 catalytic triad residues S<sup>118</sup>, D<sup>178</sup> and H<sup>229</sup> in the LLD are shown as red sticks.

155 **C.** EDS1-PAD4-interacting motifs EDS1<sup>LLIF</sup> and PAD4<sup>MLF</sup> are colored with yellow and orange  
156 sticks, respectively.

157 **D.** Co-immunoprecipitation (GFP-trap) of GFP-PAD4/PAD4<sup>LLD</sup> with EDS1/EDS1<sup>LLIF</sup>-3xFLAG  
158 transiently expressed in *N. benthamiana* leaves (using *35S::GFP-PAD4/PAD4<sup>LLD</sup>* and  
159 *35S::EDS1/EDS1<sup>LLIF</sup>-3xFLAG* constructs, respectively) A representative image from three  
160 independent experiments is shown.

161 **E.** PAD4 accumulation in independent stable transgenic Arabidopsis lines expressing YFP-  
162 PAD4<sup>WT</sup> and YFP- PAD4<sup>LLD</sup> probed by Western blotting using  $\alpha$ -GFP antibody at 24 hpi with  
163 mock (10 mM MgCl<sub>2</sub>) or *Pst* AvrRps4 treatments. A representative image from three  
164 independent experiments is shown.

165 **F.** *PAD4* transcript abundance was determined by RT-qPCR at 24 hpi in mock- or *Pst*AvrRps4-  
166 treated samples of the indicated Arabidopsis lines. Data are pooled from three independent  
167 experiments each with two to three biological replicates (n = 6-9). Bars represent means of  
168 three experimental replicates  $\pm$  SE. Relative expression and significance level is set to Col-0  
169 mock-treated samples. Asterisk indicates  $p < 0.01$ , one-way ANOVA with multiple testing  
170 correction using Tukey-HSD.

171

172

173 **Expression of PAD4<sup>LLD</sup> confers GPA resistance**

174 PAD4 acts independently of EDS1 to restrict aphid infestation, and this function is  
175 dependent on the PAD4<sup>LLD</sup> located S<sup>118</sup> and D<sup>178</sup> predicted  $\alpha/\beta$ -hydrolase catalytic triad  
176 residues (Figure 1A & 1B) [Louis et al., 2012; Pegadaraju 2007]. Since PAD4<sup>LLD</sup>  
177 accumulates in Arabidopsis, we tested whether the PAD4<sup>LLD</sup> alone is able to resist GPA  
178 infestation. Consistent with earlier data [Louis et al., 2012; Pegadaraju et al., 2007],  
179 *pad4-1*, *pad4-1/sag101-3* and a PAD4<sup>S118A</sup> line (in *pad4-1/eds1-2/EDS1<sup>SDH</sup>*; Wagner et  
180 al., 2013) permitted a significant increase in aphid population size compared to Col-0  
181 in a no-choice bioassay, indicating compromised resistance to GPA infestation (Figure  
182 2). The PAD4<sup>LLD</sup> lines resisted GPA to similar levels as PAD4<sup>WT</sup> and Col-0, even though  
183 they expressed very low PAD4<sup>LLD</sup> amounts (Figure 2). Hence, low steady state  
184 accumulation of PAD4<sup>LLD</sup> protein (Figure 1E) is sufficient to counter GPA infestation in

185 Arabidopsis, implying that PAD4<sup>LLD</sup> has an *in planta* activity. Based on these data we  
186 conclude that PAD4<sup>LLD</sup> is a stable protein entity able to confer GPA resistance.

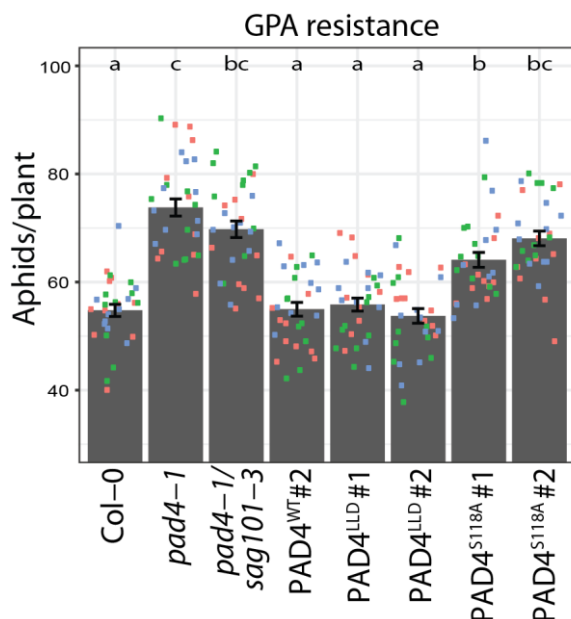

187

### 188 **Figure 2. PAD4<sup>LLD</sup> is sufficient for GPA resistance**

189 Numbers of green peach aphids (GPA) per plant at 11 days post-infestation in a no-  
190 choice assay. Data are pooled from three independent experiments each with ten  
191 biological replicates per experiment (n = 30). Squares of the same color represent ten  
192 biological replicates in an independent experiment. Bars represent mean of three  
193 experimental replicates ± SE. Differences between genotypes were determined using  
194 ANOVA (Tukey-HSD,  $p < 0.01$ ), letters indicate significance class.

195

### 196 **Arabidopsis ETI and basal pathogen immunity require full-length PAD4**

197 Since PAD4<sup>LLD</sup> transgenic plants were as resistant as Col-0 against GPA, we tested if  
198 the PAD4<sup>LLD</sup> domain also functions in basal and/or TNL-triggered pathogen immunity.

199 For this, we measured TNL ETI using the biotrophic pathogen *Hyaloperonospora*  
200 *arabidopsidis* (*Hpa*) isolate EMWA1, which is recognized in Col-0 by the TNL *RPP4*  
201 (*RESISTANCE TO PERONOSPORA PARASITICA4*) [Van der Biezen et al., 2002;

202 Asai et al., 2018]. Col-0, PAD4<sup>WT</sup> and PAD4<sup>S118A</sup> lines were fully resistant to *Hpa*

203 EMWA1, as measured by conidiophore production (Figure 3A). By contrast, PAD4<sup>LLD</sup>

204 transgenic lines were fully susceptible with conidiophore production and macroscopic

205 disease and microscopic *Hpa* colonization phenotypes resembling a *pad4-1/sag101-3*  
206 mutant (Figure 3A & Figure S3).

207 Further, we tested PAD4<sup>LLD</sup> function in TNL (RRS1-S/RPS4) ETI to *Pst avrRps4* and in  
208 basal immunity to virulent *Pst* DC3000. In basal immunity, *pad4-1* is as susceptible as  
209 *pad4-1/sag101-3* while in ETI, *pad4-1* displays intermediate susceptibility between  
210 Col-0 and *pad4-1/sag101-3* (Figure 3B & 3C) [Feys et al., 2005; Wagner et al., 2013].  
211 In line with published data, PAD4<sup>S118A</sup> was as resistant as Col-0 and PAD4<sup>WT</sup> in both  
212 basal immunity and ETI (Figure 3B & 3C), consistent with previous findings that the  
213 PAD4 S-D-H predicted catalytic triad is not required for pathogen immunity [Louis et  
214 al., 2012; Wagner et al., 2013]. PAD4<sup>LLD</sup> lines were fully susceptible to *Pst* DC3000  
215 and *Pst avrRps4*, with bacterial titers comparable to *pad4-1/sag101-3* (Figure 3B &  
216 3C), indicating that PAD4<sup>LLD</sup> is not able to confer basal immunity or ETI. Also, PAD4<sup>LLD</sup>  
217 expressing plants and *pad4-1/sag101-3* failed to induce expression of defense marker  
218 genes 24 hpi with *Pst avrRps4*, indicating that PAD4<sup>LLD</sup> is unable to signal in TNL ETI  
219 (Figure 3D-F & Figure S4). Taken together, the *Hpa* and *Pst* infection data show that  
220 PAD4<sup>LLD</sup> is non-functional in pathogen basal immunity and ETI, in stark contrast to its  
221 resistance activity against GPA.

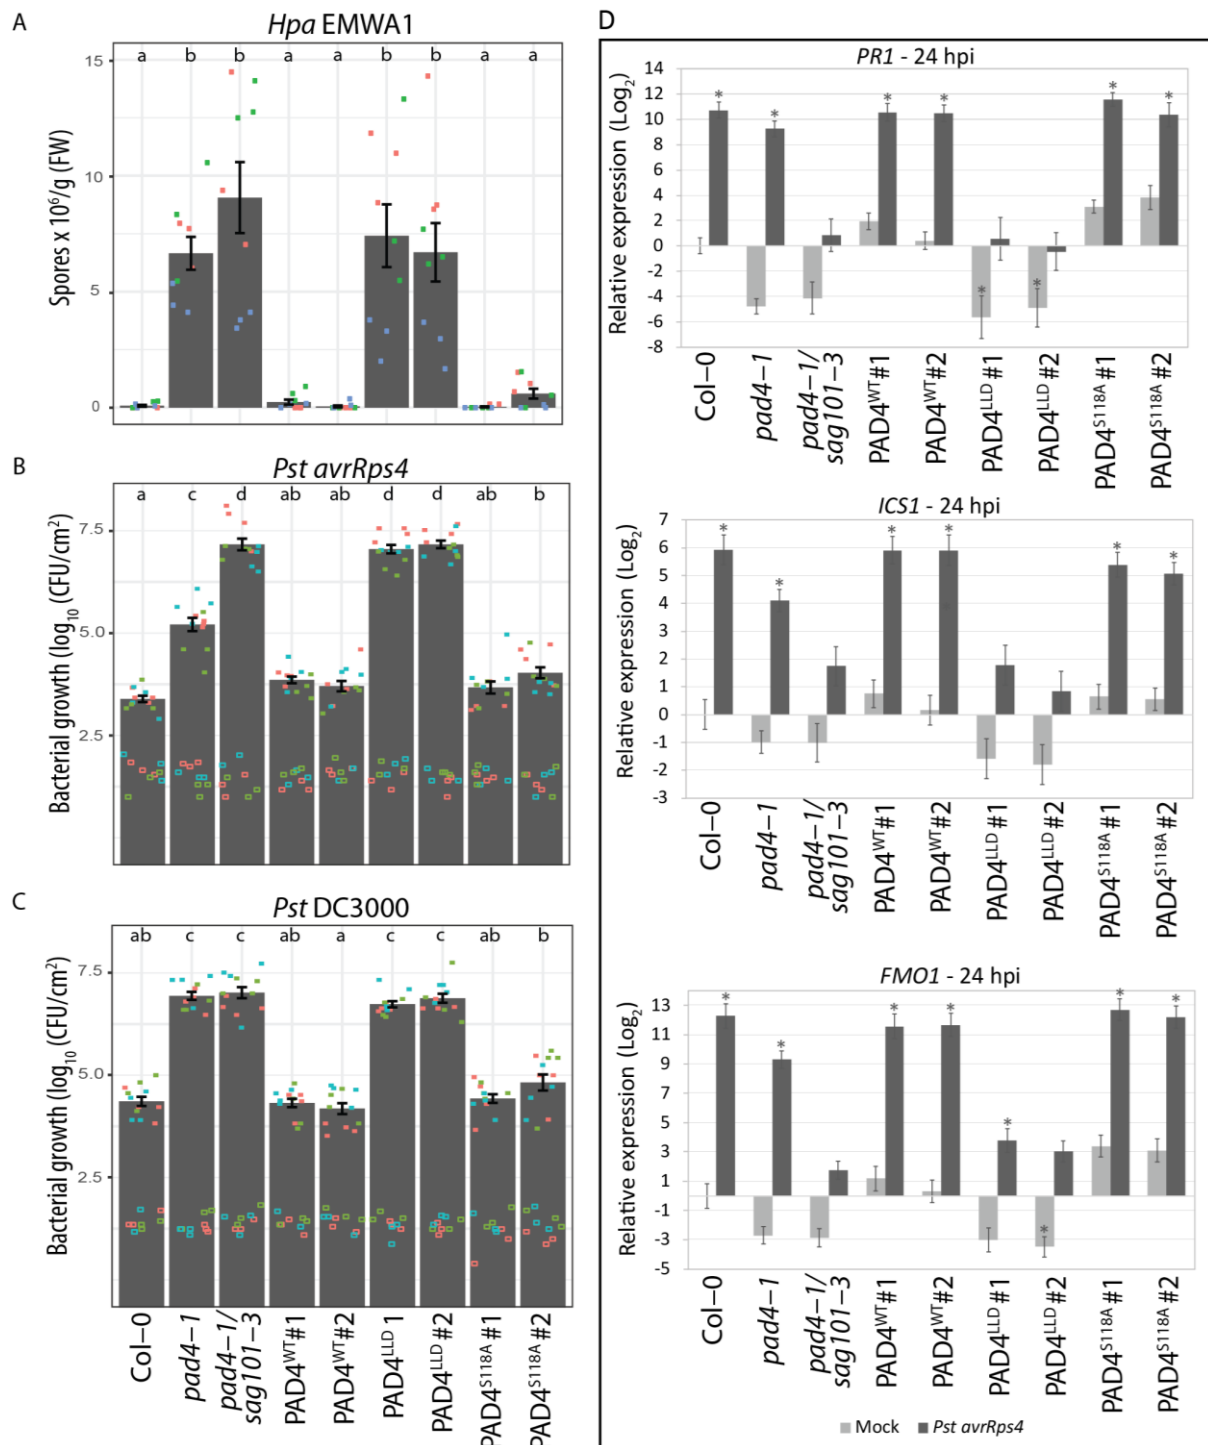

222

223

224

225

226

227

228

229

230

231

### Figure 3. PAD4<sup>LLD</sup> is not functional in Arabidopsis ETI and basal immunity

A. TNL (RPP4) ETI assay in Arabidopsis independent transgenic lines with wild-type and mutant controls, as indicated. *Hpa* EMWA1 conidiospores on leaves were quantified at 6 dpi in three independent experiments (squares; n=9). Col-0 (resistant), *pad4-1* (susceptible) and *pad4-1/sag101-3* (susceptible) functioned as controls. Squares of the same color represent three biological replicates in an independent experiment. Bars represent mean of three experimental replicates ± SE. Differences between genotypes were determined using ANOVA (Tukey-HSD,  $p < 0.01$ ), letters indicate significance class.

232 **B.** TNL (RRS1-S/RPS4) ETI assay in the same Arabidopsis independent transgenic  
233 and control lines as in A. Four-week old Arabidopsis plants were syringe infiltrated with  
234 *Pst avrRps4* (OD<sub>600</sub> = 0.0005) and bacterial titers were determined at 0 dpi (empty  
235 squares; n=8-9) and 3 dpi (filled squares; n=11-12). Squares of the same color  
236 represent 2-3 (day 0) or 3-4 (day 3) biological replicates in an independent experiment.  
237 Bars represent mean of three experimental replicates ± SE. Differences between  
238 genotypes were determined using ANOVA (Tukey-HSD,  $p < 0.01$ ), letters indicate  
239 significance class.

240 **C.** Infection assay was performed with basal immunity triggering *Pst* DC3000 (OD<sub>600</sub> =  
241 0.0005). Experimental set-up and statistical analysis as in B.

242 **D.** Transcript abundance determined by RT-qPCR in 4-week old Arabidopsis plants  
243 syringe-infiltrated with either buffer (mock, grey bars) or *Pst avrRps4* (black bars) (24  
244 hpi). Data are pooled from three independent experiments, with two to three biological  
245 replicates per experiment (n = 6-9). *PATHOGENESIS RELATED1 (PR1)*,  
246 *ISOCHORISMATE SYNTHASE1 (ICS1)*, and *FLAVIN MONOOXYGENASE1 (FMO1)*  
247 transcript abundances were measured relative to *ACTIN2 (ACT2)*. Relative expression  
248 and significance level is set to Col-0 mock-treated samples. Differences between  
249 genotypes were determined using ANOVA (Tukey-HSD), asterisks indicate  $p < 0.01$ .

## 250 Discussion

251 PAD4 controls Arabidopsis defenses against pathogens and aphids, playing major  
252 roles with EDS1 in basal and effector-triggered immunity, and an *EDS1*-independent  
253 role in resistance to GPA [Bhandari et al., 2019; Cui et al., 2017; Cui et al., 2018;  
254 Glazebrook et al., 1997; Lapin et al., 2019; Louis et al., 2012; Pegadaraju et al., 2007;  
255 Rietz et al., 2011; Wagner et al., 2013]. In this study, we investigated the contribution  
256 of the PAD4<sup>LLD</sup> to these different defense outputs. Analysis of PAD4<sup>LLD</sup> *in planta* shows  
257 that it accumulates to much lower levels than full-length PAD4 and has lost binding to  
258 EDS1. Strikingly, PAD4<sup>LLD</sup> confers complete GPA resistance (Figure 2), but is non-  
259 functional in resistance to *Hpa* and *Pst* pathogens (Figure 3). Thus, PAD4 appears to  
260 rely solely on its LLD for controlling GPA infestation, whereas its LLD and EP domains  
261 are necessary for ETI and basal immunity against bacterial and oomycete pathogens.  
262 These data suggest there are domain specific signaling functions of Arabidopsis PAD4.

263

264 Recent studies suggest that the N-terminal LLDs of Arabidopsis EDS1 and PAD4 act  
265 as a scaffold, enabling the C-terminal EP domains to interact and orchestrate

266 downstream immune signaling as a heterodimer [Bhandari et al., 2019; Lapin et al.,  
267 2019; Wagner et al., 2013]. By testing the PAD4<sup>LLD</sup> without its EP domain, our data  
268 show that PAD4, like EDS1 [Bhandari et al., 2019], requires its EP domain for immunity  
269 signaling. By contrast, the PAD4<sup>LLD</sup> is sufficient to limit GPA proliferation, thus  
270 highlighting a role of the PAD4<sup>LLD</sup> and its  $\alpha/\beta$ -hydrolase catalytic triad as a minimal  
271 functional unit in GPA resistance. *A $\Delta$ EDS1* and *A $\Delta$ PAD4* proteins mutually stabilize each  
272 other [Feys et al., 2001; Feys et al., 2005; Rietz et al., 2011; Wagner et al., 2013]. The  
273 fact that interaction between PAD4<sup>LLD</sup> and EDS1 is greatly diminished compared to  
274 interaction between full-length PAD4 and EDS1 (Figure 1D), tallies with the  
275 observation that *PAD4*-dependent GPA resistance is independent of *EDS1*  
276 [Pegadaraju et al., 2007].

277

278 The PAD4<sup>LLD</sup> adopts an  $\alpha/\beta$  hydrolase fold with a core S-D-H predicted catalytic triad.  
279 The  $\alpha/\beta$  hydrolase family catalyzes a variety of enzymatic reactions such as  
280 esterification, hydrolysis and acyl transfer [Rauwerdink & Kazlauskas, 2015]. The S-D-  
281 H predicted catalytic triad of PAD4 is dispensable for immune signaling against *Hpa*  
282 and *Pst*, but required for GPA resistance [Louis et al., 2012; Wagner et al., 2013]. In  
283 the *A $\Delta$ PAD4* structural model, this triad of residues is solvent-accessible (Figure 1A &  
284 1B), suggesting a plausible catalytic function. However, this applies only to  
285 Brassicaceae PAD4 proteins, as beyond the Brassicaceae clade PAD4 contains an  
286 insertion, which forms a “lid” covering the S-D-H triad similar to that in *A $\Delta$ EDS1*,  
287 rendering it inaccessible to the solvent [Wagner et al., 2013]. Such helical loop  
288 structures extending from the  $\beta$ -sheet scaffold have been found to regulate the  
289 enzymatic activity of inactive-state triacylglycerol lipases [Khan et al., 2017]. Hence, it  
290 is possible that the PAD4 S-D-H triad functions differently outside the Brassicaceae  
291 clade [Wagner et al., 2013]. Critically, all three residues in the catalytic triad are

292 required for hydrolase activity [Rauwerdink & Kazlauskas, 2015]. Since loss of H<sup>229</sup>  
293 does not affect *At*PAD4-mediated deterrence of GPA [Louis et al., 2012], it is more  
294 likely that PAD4 involvement in Arabidopsis defense against the GPA does not rely on  
295 a canonical hydrolase activity.

296 Alternatively, the S-D-H triad in PAD4 could function as a receptor ligand-binding  
297 domain, a common feature of  $\alpha/\beta$  hydrolase fold proteins [Mindrebo et al., 2016]. For  
298 example, the Arabidopsis karrikin receptor *At*KAI2 (KARRIKIN INSENSITIVE 2) uses  
299 its catalytically inactive S-D-H triad for ligand recognition [Guo et al., 2013].  
300 Catalytically inactive rice (*Os*) and *At*GID1 (GIBBERELLIN (GA) INSENSITIVE  
301 DWARF1) uses a modified triad (S-D-V) to bind bioactive GA molecules, indicating that  
302 the histidine, which is required for catalytic activity, can be replaced by another residue  
303 for functional ligand binding [Murase et al., 2008; Rauwerdink & Kazlauskas, 2015;  
304 Shimada et al., 2008]. Upon binding to GA, a conformational change in *At*GID1 results  
305 in the assembly of a SCF<sup>GID1</sup> (SKP-Cullin-F-box<sup>GID1</sup>) complex and ubiquitination of  
306 DELLA proteins marking them for proteasome-mediated degradation [Murase et al.,  
307 2008]. Together with the data presented here, these examples highlight the possibility  
308 that the PAD4<sup>LLD</sup> domain serves as a ligand-binding surface in a protein signaling  
309 complex, rather than a lipase.

310  
311 The inactivity of PAD4<sup>LLD</sup> in basal and effector-triggered immunity is unlikely to be  
312 attributed to PAD4<sup>LLD</sup> instability, as it is sufficient for resistance against GPA, unless  
313 the PAD4<sup>LLD</sup> fails to reach sufficient amounts needed for pathogen resistance in certain  
314 cells or tissues. Very low levels of protein were sufficient for EDS1 function in pathogen  
315 immunity [Bhandari et al., 2019; Suttman et al., 2016; Wagner et al., 2013], and we  
316 presume this is also the case for PAD4, since EDS1 and PAD4 are functional as a  
317 heterodimer. A more plausible explanation for the susceptibility of PAD4<sup>LLD</sup> might be

318 (i) its inability to form a heterodimer with EDS1 (Figure 1A & 1D; Wagner et al., 2013)  
319 and (ii) the lack of an EP domain. Both are essential in EDS1 for immunity to *Pst* and  
320 *Hpa* infection and for rapid transcriptional up-regulation of defense genes in ETI  
321 against *Pst avrRps4* [Bhandari et al., 2019; Lapin et al., 2019; Wagner et al., 2013].  
322 The EDS1 EP domain interface lining a cavity formed with PAD4 in the heterodimer is  
323 necessary for Arabidopsis EDS1 signaling [Bhandari et al., 2019; Lapin et al., 2019].  
324 An aligned EP domain  $\alpha$ -helix was identified in the EDS1 heterodimer partner,  
325 SAG101, as being essential for eliciting host cell death in TNL ETI responses [Gantner  
326 et al., 2019; Lapin et al., 2019]. This also might be true for PAD4, because mutations  
327 at an EDS1-like surface in PAD4 lying outside the cavity did not compromise immunity  
328 [Bhandari et al., 2019]. Future studies will test whether the PAD4 EP domain surface  
329 lining the heterodimer cavity is also crucial for EDS1-PAD4 pathogen immunity.

330

331 Our analysis of the LLD of Arabidopsis PAD4 demonstrates a domain-specific  
332 partitioning of defense functions - with the PAD4<sup>LLD</sup> being necessary and sufficient for  
333 limiting GPA infestation, and the EP domain (with the LLD) mediating immunity  
334 signaling against *Pst* and *Hpa* (Figure 4). While the two PAD4 domains clearly have  
335 distinct roles, instability and inactivity of the PAD4 EP domain without the LLD makes  
336 it difficult to assess whether PAD4 is a bipartite immune regulator or moonlighting in  
337 GPA resistance. This study of the PAD4<sup>LLD</sup> paves way for molecular dissection of the  
338 diverse roles of PAD4 in biotic stress resistance.

339



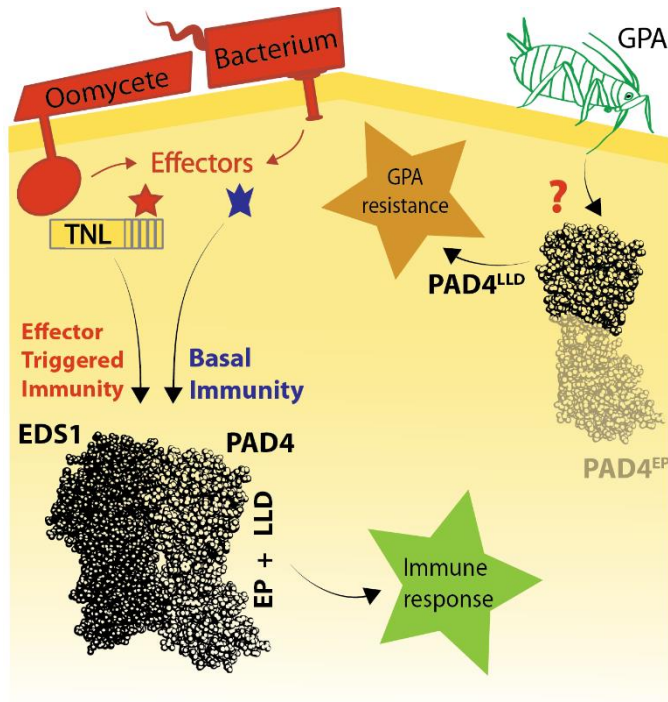

340

341 **Figure 4. Domain-specific roles of Arabidopsis PAD4 in immunity**

342 Schematic showing separable activities of PAD4<sup>LLD</sup> and PAD4<sup>LLD</sup> + EP domain. Upon  
343 infection by bacteria or oomycetes, the EDS1-PAD4 heterodimer is activated via TNLs  
344 in ETI or by other signals in basal immunity, leading to a pathogen immune response.  
345 PAD4 requires both the LLD and EP domains to function in basal immunity and ETI. In  
346 resistance to GPA, PAD4 is activated through an unknown but *EDS1*-independent  
347 mechanism that restricts aphid infestation. PAD4<sup>LLD</sup> is sufficient to limit GPA  
348 independently of interaction with EDS1.

349

350

351 **Author contributions**

352 JAD, DDB, JEP designed the study; JAD, LuD, MP and LA performed experiments,

353 JAD and JEP wrote the manuscript with inputs from DDB, LaD and JS; JEP, LaD and

354 JS provided funding.

355

356 **Acknowledgments**

357 We would like to thank Karsten Niefind for structural insights and Neysan Donnelly for  
358 help editing the manuscript.

359

360 **Materials and Methods**

361

362 **Plant materials, growth conditions and pathogen strains**

363 *Arabidopsis pad4-1*, *sag101-3*, and *eds1-2* mutants are in the Col-0 background and  
364 were previously described, as were *pEDS1:EDS1-SDH::pPAD4:PAD4-S118A* (in  
365 *eds1-2/pad4-1*) and *pPAD4:StreptII-YFP-PAD4* (in *pad4-1/sag101-3*) transgenic lines  
366 (See table S1 for primers) [Bhandari et al., 2019; Wagner et al., 2013]. *Pseudomonas*  
367 *syringae* pv. *tomato* (*Pst*) strain DC3000 and *Pst avrRps4* were described previously  
368 (Cui et al., 2017). Plants were grown on soil in a controlled environment and insect-  
369 free chambers under a 10 h light/14 h dark regime (PAR: 100-150  $\mu\text{mol}/\text{m}^2/\text{s}$ ) at 22 °C  
370 and 60% relative humidity.

371

372 **Pathogen infection assays**

373 For bacterial growth assays, *Pst avrRps4* ( $\text{OD}_{600}=0.0005$ ) in 10 mM  $\text{MgCl}_2$  was hand-  
374 infiltrated into leaves of 4-week-old plants. Bacterial titers were measured at 3 h post-  
375 infiltration (day 0) and 3 d, as described previously (Feys et al., 2005). Each biological  
376 replicate consisted of three leaf disks from different plants and data shown in each  
377 experiment are compiled from three to four biological replicates. Statistical analysis  
378 was performed using one-way ANOVA with multiple testing correction using Tukey's  
379 HSD ( $p$ -value as described in figure legend).

380 For gene expression analysis, leaves of 4-week-old plants were hand-infiltrated with  
381 mock (10 mM MgCl<sub>2</sub>) or bacteria (OD<sub>600</sub>= 0.005) and samples were taken at 24 hpi.  
382 *ACT2* was used as a reference gene (See Table S1 for primers). Data shown are  
383 results from three independent experiments each with two to three biological replicates.  
384 For protein accumulation assays, leaves from 4-week-old plants were hand-infiltrated  
385 with buffer (mock, 10 mM MgCl<sub>2</sub>) or bacteria (OD<sub>600</sub>= 0.005) and samples harvested  
386 by pooling leaves from at least three different plants.

387

388 *Hpa* isolate EMWA1 was sprayed onto 2.5 week-old plants at 4 x 10<sup>4</sup> spores/ml dH<sub>2</sub>O.  
389 *Hpa* infection structures and plant host cell death were visualized using lactophenol  
390 trypan blue staining (Muskett et al., 2002) and imaged by light microscopy (Zeiss Axio  
391 Imager). To quantify *Hpa* sporulation on leaves, three pots with ~ 10 plants per  
392 genotype were infected and treated as a biological replicate. Plants were harvested at  
393 6 dpi, fresh weight was determined. Conidiospores were suspended in 5 ml dH<sub>2</sub>O and  
394 counted under a light microscope using a Neubauer counting chamber.

395

#### 396 **Aphid no-choice bioassay**

397 For each biological replicate five one-day-old nymphs were released onto the center of  
398 a 17-day-old plant. The total number of aphids (adult + nymphs) per biological replicate  
399 were counted 11 days post infestation. Each independent experimental replicate  
400 consisted of 10 biological replicates per genotype [Nalam et al., 2018].

401

#### 402 **Plasmid constructs**

403 The pENTR/D-TOPO *PAD4* vector used for site-directed mutagenesis was cloned from  
404 cDNA and is described [Wagner et al., 2013]. PAD4<sup>LLD</sup> was obtained by site-directed  
405 mutagenesis on pENTR/D-TOPO *PAD4* according to the QuikChangeII site-directed

406 mutagenesis manual (Agilent) (See Table S1 for primers). Mutated *PAD4* and *EDS1*  
407 entry clones [Bhandari et al., 2019; Wagner et al., 2013] were verified by sequencing  
408 and recombined by an LR reaction into a pAM-PAT-based binary vector backbone  
409 [Witte et al., 2004]. Split-luciferase lines were created by LR reaction between gateway-  
410 compatible split-luciferase binary vectors [Gehl et al., 2011] and *PAD4* and *EDS1* entry  
411 clones [Bhandari et al., 2019; Wagner et al., 2013].

412

### 413 **Generation of transgenic Arabidopsis plants**

414 Stable transgenic lines were generated by transforming a binary expression vector  
415 (containing Basta resistance) into Arabidopsis null mutant *pad4-1/sag101-3* [Wagner  
416 et al., 2013], using *Agrobacterium*-mediated floral dipping (*Agrobacterium tumefaciens*  
417 GV3101 PMP90 RK) [Clough and Bent, 1998]. After selecting single-insert,  
418 homozygous transgenic lines, all lines were genotyped by sequencing for the presence  
419 of the correct PAD4 transgene ( $PAD4^{WT}$ ,  $PAD4^{LLD}$  or  $PAD4^{S118A}$ ) before performing  
420 pathogen assays.

421

### 422 **Transient expression in *N. benthamiana***

423 Transient expression in *N. benthamiana* was performed by co-infiltrating  
424 *Agrobacterium* cells carrying constructs at an OD<sub>600</sub> of 0.4-0.6 in a 1:1 ratio. Before  
425 syringe infiltration, *A. tumefaciens* cells were incubated for 3h at 28°C in induction  
426 buffer (150 μM acetosyringone, 10 mM MES pH5.6, 10 mM MgCl<sub>2</sub>) and shaken at 650  
427 rpm in an Eppendorf Thermomixer. *N. benthamiana* leaf samples were harvested at 3  
428 dpi and snap frozen in liquid nitrogen and stored at -80°C.

429

430

431 **Protein extraction, immunoprecipitation (IP) and Western blotting**

432 Total leaf extracts were processed in extraction buffer (50 mM Tris pH7.5, 150 mM  
433 NaCl, 10 % (v/v) glycerol, 2 mM EDTA, 5 mM DTT, 0.1 % Triton X-100 and protease  
434 inhibitor (Roche, 1 tablet per 50 ml)). Lysates were centrifuged for 20 min, 21,000 x *g*  
435 at 4 °C. Supernatant was used as input sample (50 µl). Immunoprecipitations were  
436 conducted by incubating the input sample (1.2 mL) with 10 µl GFP TrapMA beads  
437 (Chromotek) for 3 h at 4 °C. Beads were collected using a magnetic rack and washed  
438 four times in extraction buffer. Protein or IP samples were boiled at 96 °C in 2x Laemmli  
439 buffer for 10 min. Proteins were separated by SDS-PAGE and analyzed by  
440 immunoblotting using α-GFP (Sigma Aldrich, 11814460001) or α-FLAG (Sigma  
441 Aldrich, F7425) primary antibodies and secondary antibodies coupled to Horseradish  
442 Peroxidase (HRP, Sigma Aldrich) for protein detection on blots.

443

444 **Luciferase Assay**

445 All tested co-expression constructs were transiently expressed on one leaf. Three leaf  
446 disks (0.4 cm diameter) from three independent leaves were pooled per biological  
447 replicate and processed in reporter lysis buffer (Promega; E1500, + 150 mM Tris, pH  
448 7.5). Samples were mixed in a 1:1 ratio with substrate (Promega; E1531) and  
449 luminescence was measured. Absolute luminescence, *i.e.* absolute luciferase activity  
450 was used as a proxy for protein-protein interaction intensity.

451 **References**

- 452 1. Asai, S., Furzer, O.J., Cevik, V., Kim, D.S., Ishaque, N., Goritschnig, S.,  
453 Staskawicz, B.J., Shirasu, K., Jones, J.D.G. 2018. A downy mildew effector evades  
454 recognition by polymorphism of expression and subcellular localization. *Nature*  
455 *Communications*. 9:5192.
- 456 2. Bartsch, M., Gobbato, E., Bednarek, P., Debey, S., Schultz, J.L., Bautor, J., Parker,  
457 J.E. 2006. Salicylic Acid-Independent ENHANCED DISEASE SUSCEPTIBILITY1  
458 Signaling in Arabidopsis Immunity and Cell Death Is Regulated by the  
459 Monooxygenase FMO1 and the Nudix Hydrolase NUDT7. *Plant Cell*. 18:1038-  
460 1051.
- 461 3. Boutrot, F., Zipfel, C. 2017. Function, Discovery, and Exploitation of Plant Pattern  
462 Recognition Receptors for Broad-Spectrum Disease Resistance. *Annual Review*  
463 *of Phytopathology*. 55:257-286.
- 464 4. Bhandari, D.D., Lapin, D., Kracher, B., von Born, P., Bautor, J., Niefind, K., Parker,  
465 J.E. 2019. An EDS1 heterodimer signalling surface enforces timely reprogramming  
466 of immunity genes in Arabidopsis. *Nature Comm*. 10:772.
- 467 5. Birker, D., Heidrich, K., Takahara, H., Narusaka, M., Deslandes, L., Narusaka, Y.,  
468 Reymond, M., Parker, J.E., O'Connell, R. 2009. A locus conferring resistance to  
469 *Colletotrichum higginsianum* is shared by four geographically distinct Arabidopsis  
470 accessions. *Plant Journal*. 60:602-613.
- 471 6. Century, K.S., Holub, E.B., Staskawicz, B.J. 1995. NDR1, a locus of Arabidopsis  
472 thaliana that is required for disease resistance to both a bacterial and a fungal  
473 pathogen. *PNAS USA*. 92:6597-6601.
- 474 7. Clough, S.J. and Bent, A.F. 1998 Floral dip: a simplified method for *Agrobacterium*-  
475 mediated transformation of Arabidopsis thaliana. *Plant Journal*. 16:735-43.

- 476 8. Cui, H., Tsuda, K., Parker, J.E. 2015. Effector-Triggered Immunity: From Pathogen  
477 Perception to Robust Defense. *Ann. Rev. of Plant Bio.* 66:487-511.
- 478 9. Cui, H., Gobbato, E., Kracher, B., Qiu, J., Bautor, J., Parker, J.E. 2017 A core  
479 function of EDS1 with PAD4 is to protect the salicylic acid defense sector in  
480 *Arabidopsis* immunity. *New Phytologist.* 213:1802-1817.
- 481 10. Cui, H., Qiu, J., Zhou, Y., Bhandari, D.D., Zhao, C., Bautor, J., Parker, J.E. 2018.  
482 Antagonism of Transcription Factor MYC2 by EDS1/PAD4 Complexes Bolsters  
483 Salicylic Acid Defense in *Arabidopsis* Effector-Triggered Immunity. *Molecular*  
484 *Plant.*11:1053-1066.
- 485 11. Dodds, P.N., Rathjen, J.P. 2010. Plant immunity: towards an integrated view of  
486 plant-pathogen interactions. *Nature Reviews Genetics.*11:539-548.
- 487 12. Feys, B.J., Moisan, L.J., Newman, M.A., Parker, J.E. 2001. Direct interaction  
488 between the *Arabidopsis* disease resistance signaling proteins, EDS1 and PAD4.  
489 *EMBO Journal.* 20:5400-5411.
- 490 13. Feys, B.J., Wiermer, M., Bhat, R.A., Moisan, L.J., Medina-Escobar, N., Neu, C.,  
491 Cabral, A., Parker, J.E. 2005. *Arabidopsis* SENESCENCE-ASSOCIATED  
492 GENE101 stabilizes and signals within an ENHANCED DISEASE  
493 SUSCEPTIBILITY1 complex in plant innate immunity. *Plant Cell.*17:2601-2613.
- 494 14. Gantner, J., Ordon, J., Kretschmer, C., Guerois, R., Stuttmann, J. 2019. An EDS1-  
495 SAG101 Complex is Essential for TNL-mediated Immunity in *Nicotiana*  
496 *benthamiana*. *Plant Cell.* pii: tpc.00099.2019
- 497 15. García, A.V., Blanvillain-Baufumé, S., Huibers, R.P., Wiermer, M., Li, G., Gobbato  
498 E., Rietz, S., Parker, J.E. 2009. Balanced nuclear and cytoplasmic activities of  
499 EDS1 are required for a complete plant innate immune response. *PLoS*  
500 *Pathogens.* 6:e1000970.

- 501 16. Gehl, C., Kaufholdt, D., Hamisch, D., Bikker, R., Kudla, J., Mendel, R.R., Hänsch,  
502 R. 2011. Quantitative analysis of dynamic protein-protein interactions in planta by  
503 a floated-leaf luciferase complementation imaging (FLuCI) assay using binary  
504 Gateway vectors. *Plant Journal*.67:542-553.
- 505 17. Glazebrook, J., Zook, M., Mert, F., Kagan, I., Rogers, E.E., Crute, I.R., Holub, E.B.,  
506 Hammerschmidt, R., Ausubel, F.M. 1997. Phytoalexin-deficient mutants of  
507 *Arabidopsis* reveal that PAD4 encodes a regulatory factor and that four PAD genes  
508 contribute to downy mildew resistance. *Genetics*.146:381-392.
- 509 18. Heidrich, K., Wirthmueller, L., Tasset, C., Pouzet, C., Deslandes, L., Parker, J.E.  
510 2011. *Arabidopsis* EDS1 connects pathogen effector recognition to cell  
511 compartment-specific immune responses. *Science*. 334:1401-1404.
- 512 19. Jirage, D., Tootle, T.L., Reuber, T.L., Frost, L.N., Feys, B.J., Parker, J.E., Ausubel  
513 F.M., Glazebrook, J. 1999. *Arabidopsis thaliana* PAD4 encodes a lipase-like gene  
514 that is important for salicylic acid signaling. *PNAS USA*.96:13583-13588.
- 515 20. Jones, J.D., Vance, R.E., Dangl, J.L. 2016. Intracellular innate immune  
516 surveillance devices in plants and animals. *Science*. 354:aaf6395.
- 517 21. Jones, J.D., Dangl, J.L. 2006. The plant immune system. *Nature*. 16:323-329.
- 518 22. Khan, F.I., Lan, D., Durrani, R., Huan, W., Zhao, Z., Wang, Y. 2017. The Lid  
519 Domain in Lipases: Structural and Functional Determinant of Enzymatic  
520 Properties. *Front. Bioeng. Biotech*. 5:16.
- 521 23. Lapin, D., Kovacova, V., Sun, X., Dongus, J.A., Bhandari, D.D., von Born, P.,  
522 Bautor, J., Guarneri, N., Stuttmann, J., Beyer, A., Parker, J.E. 2019. A coevolved  
523 EDS1-SAG101-NRG1 module mediates cell death signaling by TIR-domain  
524 immune receptors. *BioRxiv*: doi: <https://doi.org/10.1101/572826>



- 525 24. Louis, J., Gobbato, E., Mondal, H.A., Feys, B.J., Parker, J.E., Shah, J. 2012.  
526 Discrimination of Arabidopsis PAD4 Activities in Defense against Green Peach  
527 Aphid and Pathogens. *Plant Physiology*. 158:1860-1872.
- 528 25. Milligan, S.B., Bodeau, J., Yaghoobi, J., Kaloshian, I., Zabel, P., and Williamson,  
529 V.M. 1998. The Root Knot Nematode Resistance Gene Mi from Tomato Is a  
530 Member of the Leucine Zipper, Nucleotide Binding, Leucine-Rich Repeat Family of  
531 Plant Genes. *Plant Cell*. 10:1307.
- 532 26. Mindrebo, J.T., Nartey, C.M., Seto, Y., Burkart, M.D., Noel, J.P. 2016. Unveiling  
533 the functional diversity of the alpha/beta hydrolase superfamily in the plant  
534 kingdom. *Current Opinion Struct. Biology*. 41:233-246.
- 535 27. Mine, A., Nobori, T., Salazar-Rondon, M.C. Winkelmüller, T.M., Anver, S., Becker,  
536 D., Tsuda, K. 2017. An incoherent feed-forward loop mediates robustness and  
537 tunability in a plant immune network. *EMBO Reports*. 18:464-476.
- 538 28. Murase, K., Hirano, Y., Sun, T.P., Hakoshima, T. 2008. Gibberellin-induced DELLA  
539 recognition by the gibberellin receptor GID1. *Nature*. 456:459-463.
- 540 29. Muskett, P.R., Kahn, K., Austin, M.J., Moisan, L.J., Sadanandom, A., Shirasu, K.,  
541 Jones, J.D.G., Parker, J.E. 2002. Arabidopsis RAR1 Exerts Rate-Limiting Control  
542 of R Gene-Mediated Defenses against Multiple Pathogens. *Plant Cell*. 14:979-992.
- 543 30. Nalam, V., Louis, J., Patel, M. and Shah, J. 2018. Arabidopsis-Green Peach Aphid  
544 Interaction: Rearing the Insect, No-choice and Fecundity Assays, and Electrical  
545 Penetration Graph Technique to Study Insect Feeding Behavior. *Bio-protocol*  
546 8(15): e2950.
- 547 31. Narusaka, M., Shirasu, K. Noutoshi, Y., Kubo, Y., Shiraishi, T., Iwabuchi, M.,  
548 Narusaka, Y. 2009.. RRS1 and RPS4 provide a dual resistance-gene system  
549 against fungal and bacterial pathogens. *Plant Journal*. 60:218-226.

- 550 32. Rossi, M., Goggin, F.L., Milligan, S.B., Kaloshian, I., Ullman, D.E., Williamson,  
551 V.M. 1998. The nematode resistance gene Mi of tomato confers resistance against  
552 the potato aphid. PNAS USA. 95:9750-9754.
- 553 33. Parker, J.E., Holub, E.B., Frost, L.N., Falk, A., Gunn, N.D., Daniels, M.J. 1996.  
554 Characterization of eds1, a mutation in Arabidopsis suppressing resistance to  
555 Peronospora parasitica specified by several different RPP genes. Plant Cell.  
556 8:2033-2046.
- 557 34. Pegadaraju, V., Knepper, C., Reese, J., Shah, J. 2005. Premature leaf senescence  
558 modulated by the Arabidopsis PHYTOALEXIN DEFICIENT4 gene is associated  
559 with defense against the phloem-feeding green peach aphid. Plant Physiology.  
560 139:1927-1934.
- 561 35. Pegadaraju, V., Louis, J., Singh, V., Reese, J.C., Bautor, J., Feys, B.J., Cook, G.,  
562 Parker, J.E., Shah, J. 2007. Phloem-based resistance to green peach aphid is  
563 controlled by Arabidopsis PHYTOALEXIN DEFICIENT4 without its signaling  
564 partner ENHANCED DISEASE SUSCEPTIBILITY1. Plant Journal. 52:332-341.
- 565 36. Rauwerdink, A., and Kazlauskas, R. J. 2015. How the Same Core Catalytic  
566 Machinery Catalyzes 17 Different Reactions: the Serine-Histidine-Aspartate  
567 Catalytic Triad of  $\alpha/\beta$ -Hydrolase Fold Enzymes. ACS Catalysis. 5:6153-6176.
- 568 37. Rietz, S., Stamm, A., Malonek, S., Wagner, S., Becker, D., Medina-Escobar, N.,  
569 Vlot, A.C., Feys, B.J., Niefind, K., Parker, J.E. 2011. Different roles of Enhanced  
570 Disease Susceptibility1 (EDS1) bound to and dissociated from Phytoalexin  
571 Deficient4 (PAD4) in Arabidopsis immunity. New Phytologist. 191:107-119.
- 572 38. Saucet, S.B., Ma, Y., Sarris, P.F., Furzer, O.J., Sohn, K.H., Jones, J.D. 2015. Two  
573 linked pairs of Arabidopsis TNL resistance genes independently confer recognition  
574 of bacterial effector AvrRps4. Nature Comm. 6:6338.

- 575 39. Shimada, A., Ueguchi-Tanaka, M., Nakatsu, T., Nakajima, M., Naoe, Y., Ohmiya,  
576 H., Kato, H., Matsuoka, M. 2008. Structural basis for gibberellin recognition by its  
577 receptor GID1. *Nature*. 456:520-523.
- 578 40. Stuttmann, J., Peine, N., Garcia, A.V., Wagner, C., Choudhury, S.R., Wang, Y.,  
579 James, G.V., Griebel, T., Alcázar, R., Tsuda, K., Schneeberger, K., Parker, J.E.  
580 2016. Arabidopsis thaliana DM2h (R8) within the Landsberg RPP1-like Resistance  
581 Locus Underlies Three Different Cases of EDS1-Conditioned Autoimmunity. *PLoS*  
582 *Genetics* 12:e1005990.
- 583 41. Van der Biezen, E.A., Freddie, C.T., Kahn, K., Parker, J.E., Jones, J.D. 2002.  
584 Arabidopsis RPP4 is a member of the RPP5 multigene family of TIR-NB-LRR  
585 genes and confers downy mildew resistance through multiple signalling  
586 components. *Plant Journal*. 29:439-451.
- 587 42. Villada, E.S., González, E.G., López-Sesé, A.I., Castiel, A.F., Gómez-Guillamón,  
588 M.L. 2009. Hypersensitive response to *Aphis gossypii* Glover in melon genotypes  
589 carrying the Vat gene. *Journal of Experimental Botany*. 60:3269-3277.
- 590 43. Wagner, S., Stuttmann, J., Rietz, S., Guerois, R., Brunstein, E., Bautor, J., Niefind,  
591 K., Parker, J.E. 2013. Structural basis for signaling by exclusive EDS1 heteromeric  
592 complexes with SAG101 or PAD4 in plant innate immunity. *Cell Host*  
593 *Microbe*.14:619-630.
- 594 44. Wang, D., Zhang, L., Hu, J., Gao, D., Liu, X., Sha, Y. 2018. Comparative genomic  
595 analysis of the Lipase3 gene family in five plant species reveals distinct  
596 evolutionary origins. *Genetica*.146:179-185.
- 597 45. Witte, C.-P., Noël, L., Gielbert, J., Parker, J., Romeis, T. 2004. Rapid one-step  
598 protein purification from plant material using the eight-amino acid StrepII epitope.  
599 *Plant Molecular Biology*. 55:135-147.

600 46. Wroblewski, T., Piskurewicz, U., Tomczak, A., Ochoa, O., Michelmore, R.W. 2007.  
601 Silencing of the major family of NBS-LRR encoding genes in lettuce results in the  
602 loss of multiple resistance specificities. *Plant Journal*. 51:803-818

603 47. Zhou, N., Tootle, T.L., Tsui, F., Klessig, D.F., Glazebrook J. 1998. PAD4 functions  
604 upstream from salicylic acid to control defense responses in *Arabidopsis*. *Plant*  
605 *Cell*. 10:1021-1030.

606

607 **Supplemental Material**

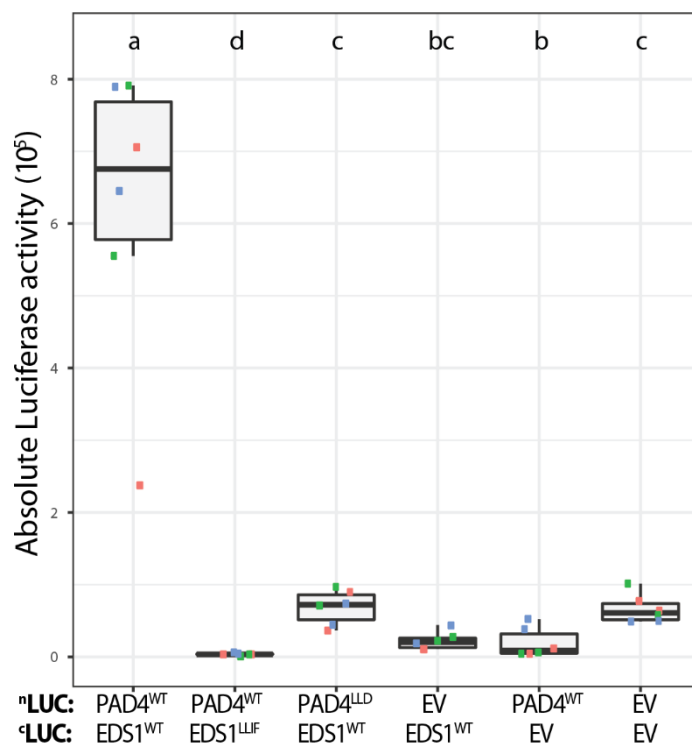

608

609 **Figure S1. Split-luciferase interaction assay**

610 Absolute luciferase (LUC) activity from transiently co-expressed N-LUC or C-LUC  
611 constructs (35S promoter) in *N. benthamiana*. Data are pooled from three independent  
612 experiments with two biological replicates per experiment (n = 6). Error bars = SEM.  
613 Letters indicate statistical significance as determined by one-way ANOVA with multiple  
614 testing correction using Tukey-HSD;  $p < 0.01$ .

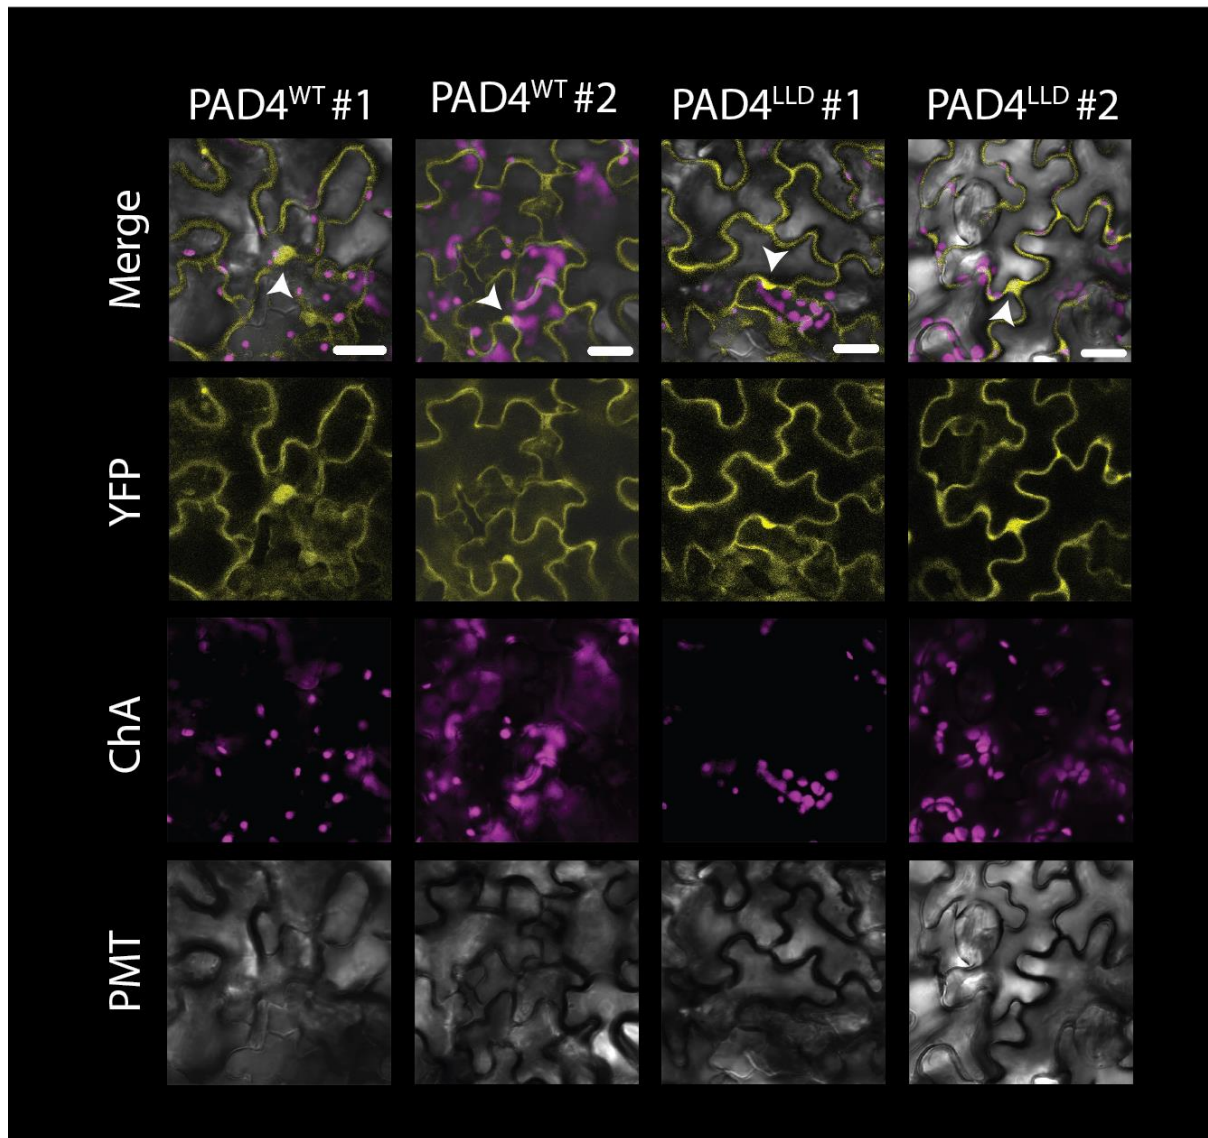

615

616 **Figure S2. PAD4 localization at 24 hpi with *Pst AvrRps4***

617 Nucleocytoplasmic localization of YFP-PAD4<sup>WT</sup> and YFP-PAD4<sup>LLD</sup> in Arabidopsis  
618 transgenic lines (24 hpi, *Pst avrRps4*). To determine PAD4<sup>LLD</sup> localizations, confocal  
619 microscope sensitivity was enhanced to enable its detection. White arrowheads  
620 indicate nuclei and white bars correspond to 20  $\mu$ m. Similar results were obtained in  
621 two independent replicates in two biological replicates (n=4).

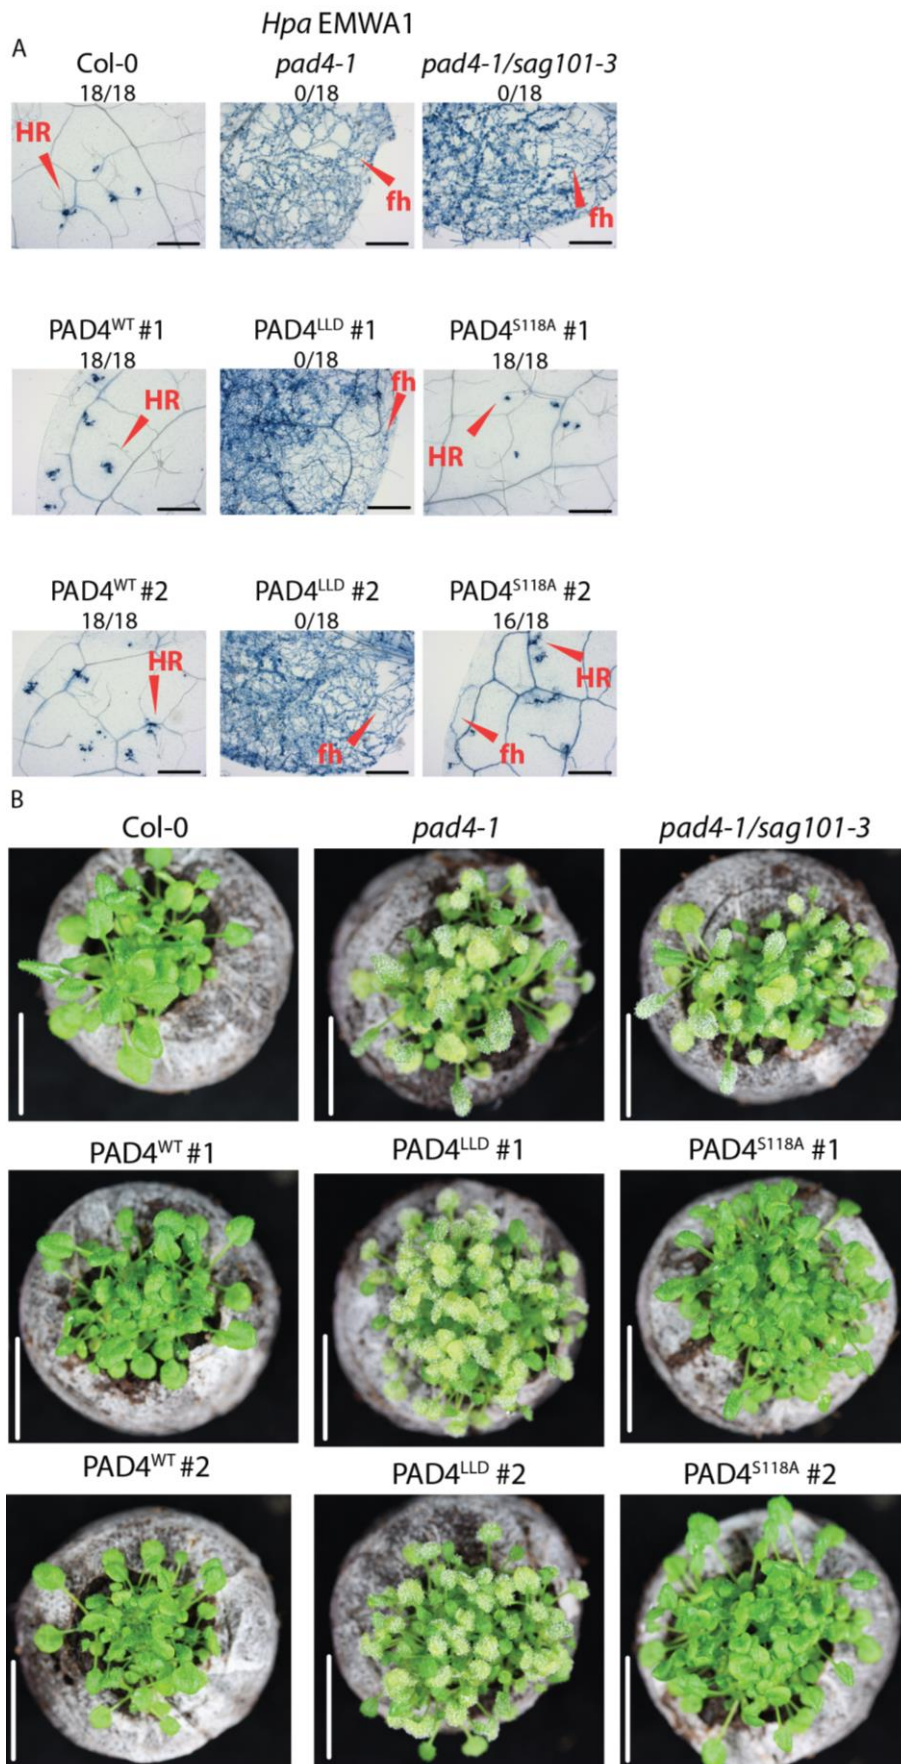

623 **Figure S3. Microscopic and macroscopic disease phenotypes of *Hpa* EMWA1-infected**  
624 ***Arabidopsis* plants**

625 **A.** Microscopic immunity phenotypes of 3-week-old *Arabidopsis* lines, as indicated, at  
626 6 dpi with *Hpa* isolate EMWA1 (recognized by TNL RPP4). Trypan blue-stained leaves  
627 showing free hyphae (fh) and hypersensitive cell death (Hypersensitive Response  
628 (HR)). Black bars represent 500  $\mu\text{m}$ . Fractions (*e.g.* 18/18) indicate numbers of  
629 resistant leaves/total plants tested. Pictures are representative from three independent  
630 experimental replicates, > 6 leaves per replicate and > 30 infection sites per genotype.  
631 **B.** *Hpa* EMWA1-inoculated plants of the same lines as in A. Resistant plants look  
632 healthy at 6 dpi, whereas susceptible plants produce conidiospores and leaf chlorosis.  
633 White bars correspond to 2 cm.

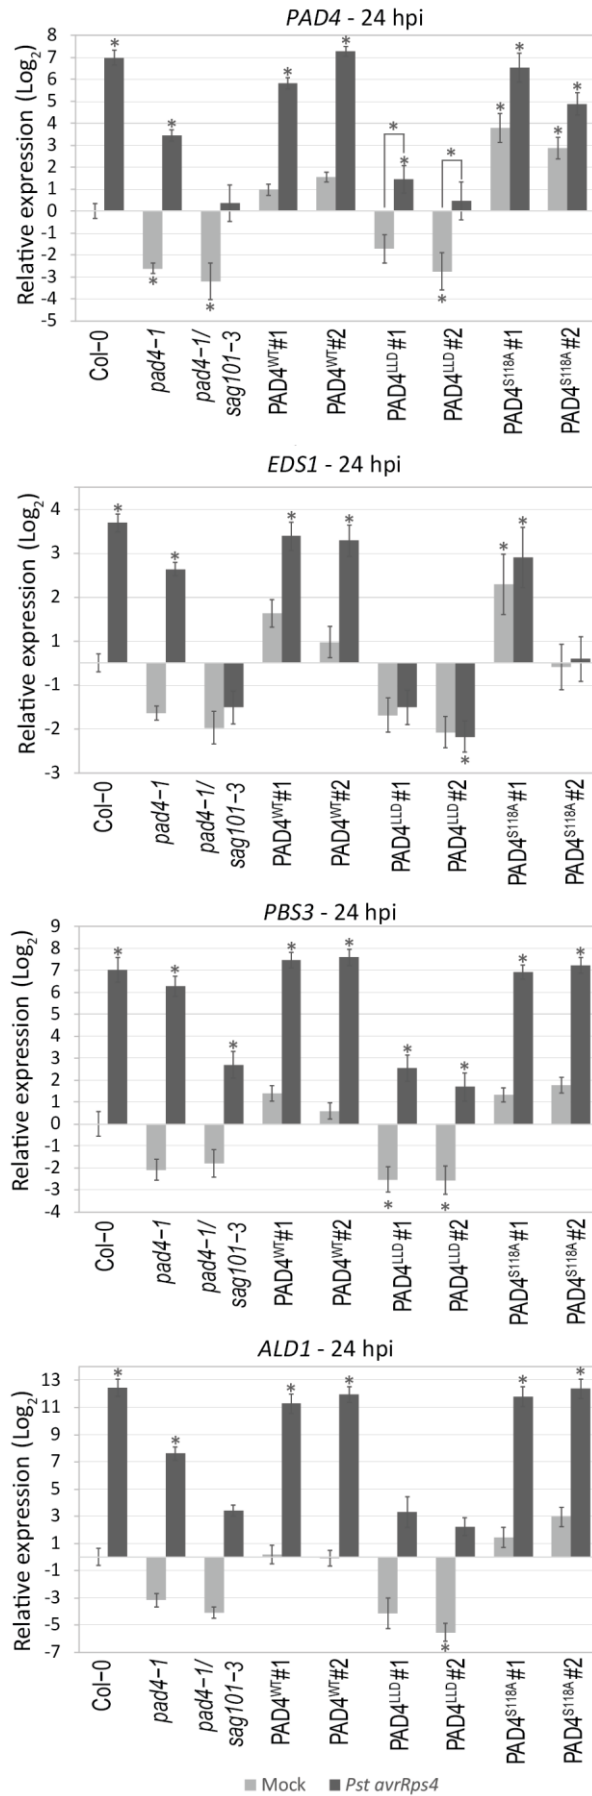



635 **Figure S4. Relative expression of *EDS1*-dependent defense marker genes**

636 Transcript abundance was determined by RT-qPCR in 4-week old Arabidopsis plants  
637 of the indicated lines syringe infiltrated with buffer- (mock, grey bars) or *Pst avrRps4*  
638 (black bars) (24 hpi). Data are pooled from three independent experiments with two to  
639 three biological replicates per experiment (n = 6-9). Transcript abundances of *PAD4*,  
640 *EDS1*, *AVRPPHB SUSCEPTIBLE 3 (PBS3)* and *GD2-LIKE DEFENSE RESPONSE*  
641 *PROTEIN 1 (ALD1)* were measured relative to *ACT2*. Relative expression and  
642 significance level are set to Col-0 mock-treated samples. Bars represent mean of three  
643 experimental replicates  $\pm$  SE. Differences between genotypes were determined by  
644 using ANOVA (Tukey-HSD,  $p < 0.01$ ), letters indicate significance class and asterisk  
645 indicates  $p < 0.01$ .

646 **Table S1. List of DNA primers used in this study**

| Purpose    | Primer                | Oligo Sequence              |
|------------|-----------------------|-----------------------------|
| Cloning    | PAD4_LLD_F            | CCTATTCTGAGGTAAGCTGAGTTAGCC |
| Cloning    | PAD4_LLD_R            | GGCTAACTCAGCTTACCTCAGAATAGG |
| qPCR       | qPAD4_F               | GGTTCTGTTCGTCTGATGTTT       |
| qPCR       | qPAD4_R               | GTTCTCGGTGTTTTGAGTT         |
| qPCR       | qEDS1_F               | CGAAGACACAGGGCCGTA          |
| qPCR       | qEDS1_R               | AAGCATGATCCGCACTCG          |
| qPCR       | qPBS3_F               | ACACCAGCCCTGATGAAGTC        |
| qPCR       | qPBS3_R               | CCCAAGTCTGTGACCCAGTT        |
| qPCR       | qICS1_F               | TTCTGGGCTCAAACACTAAAAC      |
| qPCR       | qICS1_R               | GGCGTCTTGAAATCTCCATC        |
| qPCR       | qFMO1_F               | GTTTCGTGGTTGTGTGTACCG       |
| qPCR       | qFMO1_R               | TGTGCAAGCTTTTCCTCCTT        |
| qPCR       | qPR1_F                | TTCTTCCCTCGAAAGCTCAA        |
| qPCR       | qPR1_R                | AAGGCCACCAGAGTGTATG         |
| qPCR       | qALD1_F               | TGGCCTTAAGGAGATACGGT        |
| qPCR       | qALD1_R               | ACCTGAGCCTGGTACTGTTA        |
| Genotyping | pad4-1_F              | GCGATGCATCAGAAGAG           |
| Genotyping | pad4-1_R              | TTAGCCCAAAGCAAGTATC         |
| Genotyping | SAG101_F              | GCGGCCTCCTCTCTACTTCT        |
| Genotyping | SAG101_R              | CTTCTTGAAACCATCGAACC        |
| Genotyping | sag101-3_F (GABI-KAT) | ATATTGACCATCATACTCATTGC     |
| Genotyping | sag101-3_R            | TTGTGACTTACCATAACTCTCG      |
| Genotyping | EDS1_F                | ACACAAGGGTGATGCGAGACA       |
| Genotyping | eds1-2_F              | CAAACGTCAAGAGAGCTGAG        |
| Genotyping | eds1-2/EDS1_R         | GTGGAAACCAAATTTGACATTAG     |
